# Supplementary material for: Applying metagenomics for the identification of bacterial cellulases that are stable in ionic liquids
Source: Royal Society of Chemistry journal article supplement (doi:10.1039/b820157a), 2009-01-01
Supplement: b820157a.pdf [file b820157a.pdf]

1 **Supplementary Material - *Molecular Biology Methods***

2

3 *DNA isolation protocols*

4 The DNA from the aquatic community was isolated with the Aqua Pure genomic DNA  
5 Kit (BioRad) according to the manufacturer's protocol. The DNA of the soil sample was  
6 isolated as described previously<sup>19</sup>. Cosmid libraries were constructed in pWE15 (Stratagene,  
7 La Jolla, CA.) as previously published<sup>19</sup>. DNA fragments obtained after partial *Bsp134I*  
8 digestion were ligated into *Bam*HI restriction sites of the cosmid vector. Phage packaging  
9 mixtures obtained from Stratagene, and infection of *E. coli* VCS257 was performed using the  
10 manufacturer's protocol.

11

12 *Identification of cellulase-positive clones, subcloning and DNA sequence analysis*

13 Cellulase-positive clones were screened for by using a colorimetric assay on Congo  
14 red indicator plates<sup>26</sup> as previously described<sup>1</sup>. Cellulase positive cosmid clones were  
15 digested with the restriction enzymes *Eco*RI and *Sma*I respectively and subcloned in  
16 pTZ19R (Cm<sup>R</sup>, Göttingen Genome Laboratory, G2L). These subclones were screened again  
17 for cellulase activity. Positive clones were sequenced.

18 *Preparing of crude cell extracts of cellulase encoding cosmid clones.*

19 For the preparation of the crude cell extracts 200 ml LB cultures with 0.2% (w/v)  
20 carboxymethylcellulose (CMC) containing ampicillin (100 µg/ml) were grown at 30°C to OD  
21 1.0 -1.5. Cells were harvested and resuspended in 50 mM Tris-HCl pH8.0 prior to cell  
22 disruption through sonication (Sonicator UP 200S, Hielscher, Germany) at 50% amplitude  
23 and cycle 0.5 for 5 min. After centrifuging at 13000 rpm and 4°C for 30 min the crude cell  
24 extract was stored at -20°C till further use.

1 *Overexpression of the cellulase genes celA<sub>10</sub> celA<sub>20</sub> and celA<sub>24</sub>*

2 The cellulase encoding genes, *celA<sub>10</sub>*, *celA<sub>20</sub>* and *celA<sub>24</sub>*, were amplified from cosmid  
3 DNA using PCR in 35 cycles with primer pairs *celA<sub>10</sub>*-forward 5'-CTACATATGTTTGT  
4 ACCCGTTCCG-3' and *celA<sub>10</sub>*-reverse 5'-GGATCCGGGGCTACAGAACTT-3', *celA<sub>20</sub>*-  
5 forward 5'-CGCGAGATATTTTCATATGAAAAATCCGTCCAG-3' and *celA<sub>20</sub>*-reverse 5'-  
6 GGATCCTTACAAACTTCCGCTAAGG-3' and for *celA<sub>24</sub>*- forward 5'-  
7 GTCATATGAAATTCCTCGCATCACTGC-3' and *celA<sub>24</sub>* reverse 5'-  
8 GGATCCTTTCTTATTTTCGCGCAGCAT-3' Primers were designed to introduce a 3'-*Bam*HI  
9 restriction site and a 5'-*Nde*I site into the cloned fragments. To increase cloning efficiency the  
10 PCR fragments were first ligated into pDrive (PCR Cloning Kit, Qiagen, Hilden, Germany),  
11 then excised with *Nde*I and *Bam*HI and ligated into pET19b (Novagen/Merck KGaA,  
12 Darmstadt, Germany). The recombinant clones were sequenced and the clones  
13 pJPpET*CelA<sub>10</sub>*, pJPpET*CelA<sub>20</sub>* and pJPpET*CelA<sub>24</sub>* were chosen for overproduction. *E. coli*  
14 BL21/pRIL, carrying the *celA<sub>10</sub>* gene, *celA<sub>20</sub>* gene and *celA<sub>24</sub>* gene respectively in pET19b,  
15 was grown to OD 0.6 in LB broth containing ampicillin (100 µg ml<sup>-1</sup>) at 37°C and 150 rpm,  
16 and expression of the *celA* genes was induced by adding 0.05 M isopropyl thio-β-D-  
17 galactoside (IPTG) followed by an incubation at 30°C for 4 h. Cells were harvested and  
18 resuspended in 50 mM Tris-HCl pH8.0 prior to disruption through a French pressure cell at  
19 20,000 psi cell pressure. The molecular mass of the *CelA* Proteins was determined by SDS-  
20 gel electrophoresis.

21

22 *Directed evolution of CelA<sub>10</sub> employing Sequence saturation mutagenesis (SeSaM)*

23 A SeSaM-Tv<sup>+</sup> library for all four nucleotides in the coding strand of *celA<sub>10</sub>* was  
24 generated as described previously<sup>27</sup>, using pET-19b vector specific primers SeSaM-fwd-F1  
25 5'-CACACTACCGCACTCCGTCGCGACTCACTATAGGGGAATTGTGAGCGGA-3' and

1 SeSaM-rev-R4 5'-GTGTGATGGCGTGAGGCAGCGCAAAAAACCCCTCAAGACCCGTT  
2 TAGA-3' for SeSaM template generation. The purified PCR product of the *celA*<sub>10</sub> SeSaM-Tv<sup>+</sup>  
3 random mutagenesis library was ligated in *EcoRV*-digested pBluescriptSK+ (Stratagene, La  
4 Jolla, CA) and transformed into *E. coli* DH5 $\alpha$ . Clones were screened in deep well plates with  
5 30% IL6 (v/v) using dinitro-salicylic acid reagent<sup>24</sup>. Clones with better activities than the wild  
6 type were tested with incubation over 17 h in buffer and up to 30% IL6 (v/v) and 20% IL7  
7 (v/v) and IL8 (v/v) and sequenced.

8

9

10

11 **Supplementary Material – Additional FIGURE legends**

12 **FIG. 1. Effects of various additives on cellulase activities; of A) solvents, detergents B)**  
13 **bivalent metals and EDTA on the activities of the Cellulases CelA<sub>10</sub>, CelA<sub>20</sub> and CelA<sub>24</sub>.**  
14 **Activity was measured using the standard assay and control activity was taken as 100%.**

15

16

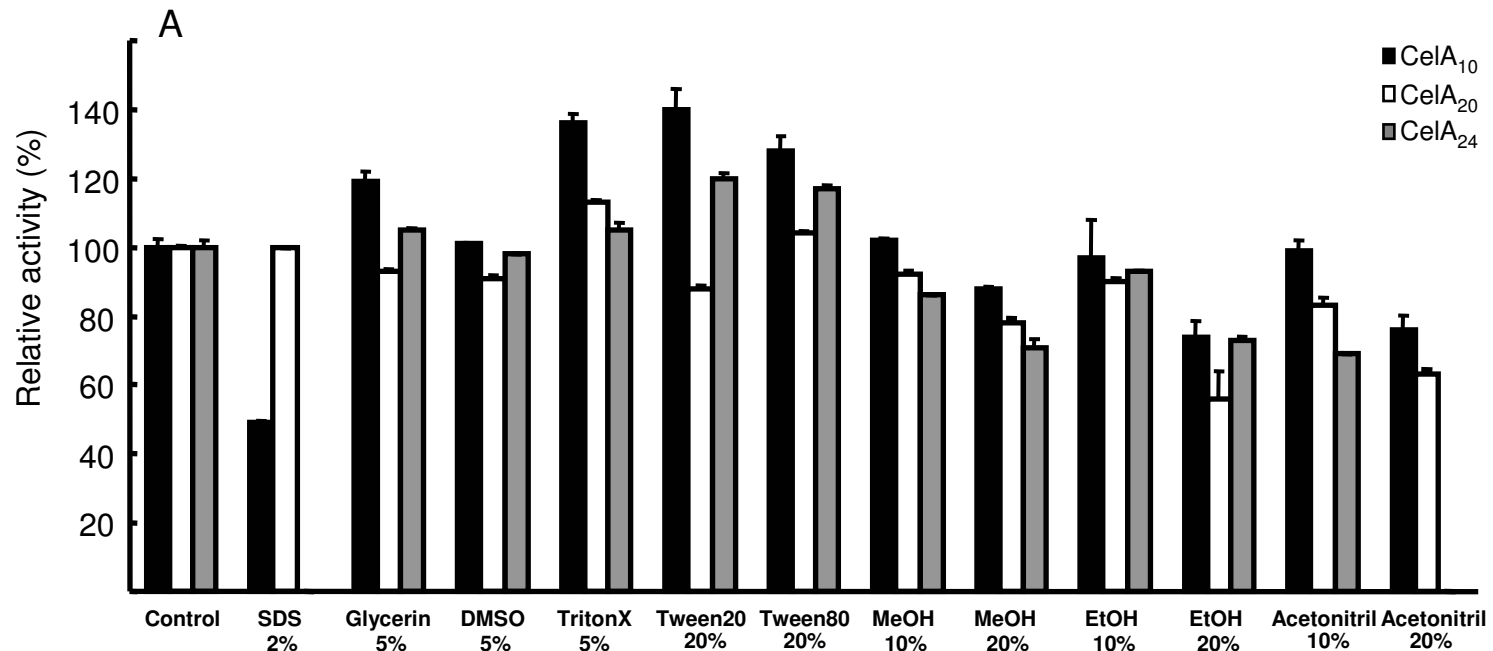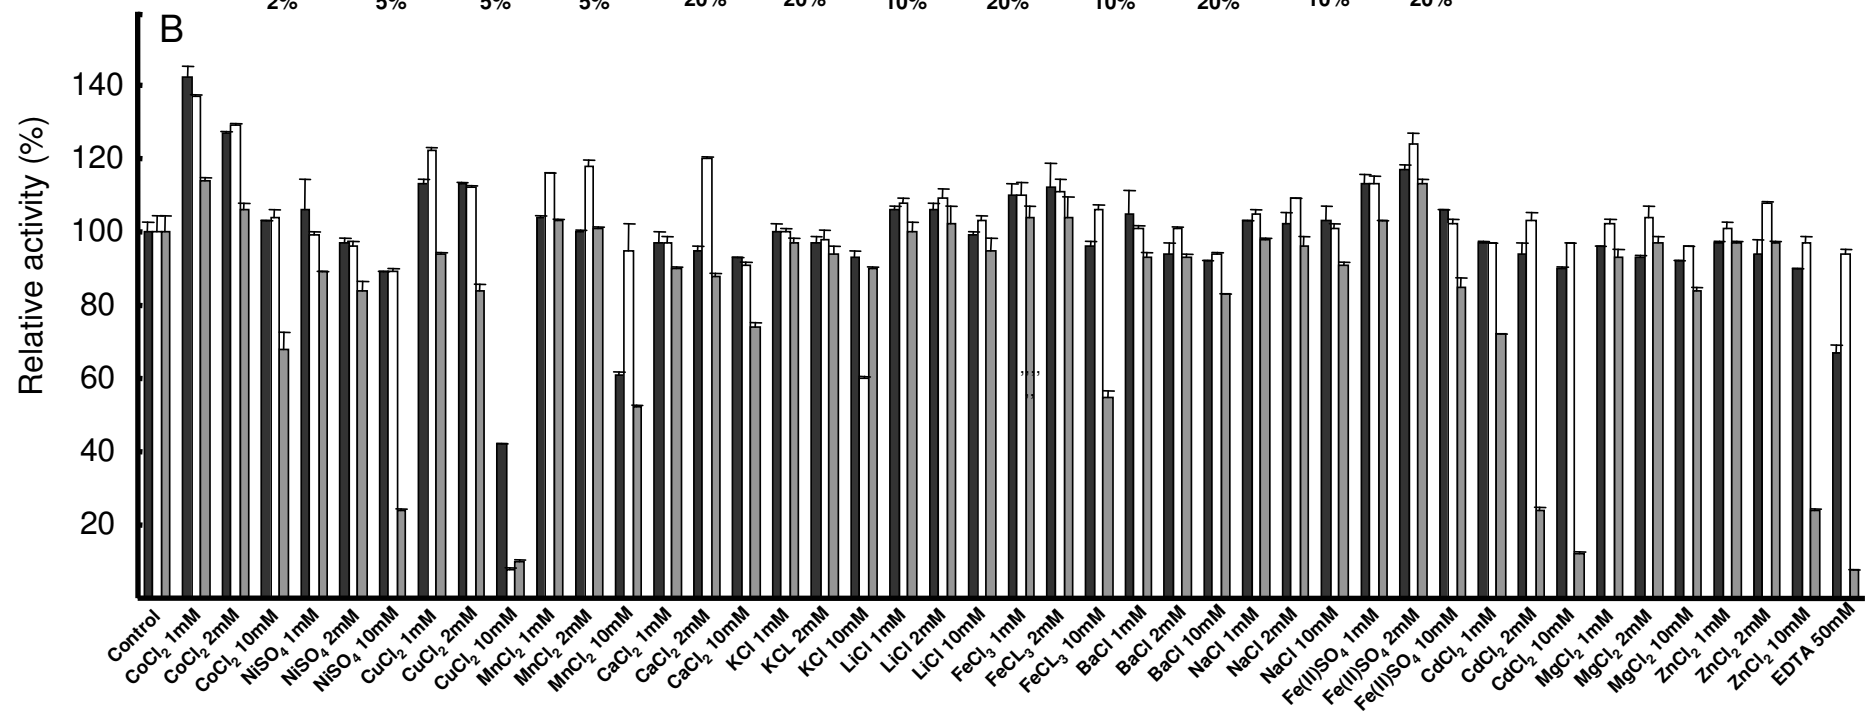

Figure 1; supplementary Material, Pottkämper et al. 2009
